# Supplementary material for: Wild Duck (Anas platyrhynchos) as a Source of Antibiotic-Resistant Salmonella enterica subsp. diarizonae O58—The First Report in Poland
Source: MDPI journal article supplement (doi:10.3390/antibiotics11040530), 2022-04-15
Supplement: s1 [file s1]

**Supplemental materials Table S1. A summary of the results of biochemical reactions for the isolated strain of *Salmonella enterica* subsp. *diarizonae*, O58 from mallard duck (*Anas platyrhynchos*) from Poland, in the VITEK test, API-20E and individual biochemical lab-made tests**

| Reactions/<br>Enzymes | VITEK2<br><i>Salmonella enterica</i><br><i>spp. diarizonae</i><br>(99% pobability) | API 20E<br>89,6% <i>Salmonella</i> spp/<br>10,3% <i>Salmonella</i><br><i>enterica ssp. arizonae.</i> | Individual<br>biochemical lab-<br>made tests |
|-----------------------|------------------------------------------------------------------------------------|------------------------------------------------------------------------------------------------------|----------------------------------------------|
| BGAL                  | +                                                                                  | -                                                                                                    | +                                            |
| H2S                   | +                                                                                  | +                                                                                                    | +                                            |
| dGLU                  | +                                                                                  | +                                                                                                    | +                                            |
| dMAN                  | +                                                                                  | +                                                                                                    | +                                            |
| URE                   | -                                                                                  | -                                                                                                    | -                                            |
| dSOR                  | +                                                                                  | -                                                                                                    | not included                                 |
| SAC                   | -                                                                                  | -                                                                                                    | -                                            |
| CIT                   | -                                                                                  | -                                                                                                    | +                                            |
| ODC                   | +                                                                                  | +                                                                                                    | not included                                 |
| LDC                   | +                                                                                  | +                                                                                                    | +                                            |
| APPA                  | -                                                                                  | not included                                                                                         | not included                                 |
| ADO                   | -                                                                                  | not included                                                                                         | not included                                 |
| PyrA                  | -                                                                                  | not included                                                                                         | not included                                 |
| IARL                  | -                                                                                  | not included                                                                                         | not included                                 |
| dCEL                  | -                                                                                  | not included                                                                                         | not included                                 |
| BNAG                  | -                                                                                  | not included                                                                                         | not included                                 |
| AGLTp                 | -                                                                                  | not included                                                                                         | not included                                 |
| GGT                   | -                                                                                  | not included                                                                                         | not included                                 |
| OFF                   | +                                                                                  | not included                                                                                         | +                                            |
| BGLU                  | -                                                                                  | not included                                                                                         | not included                                 |
| dMAL                  | +                                                                                  | not included                                                                                         | +                                            |
| dMNE                  | +                                                                                  | not included                                                                                         | not included                                 |
| BXYL                  | -                                                                                  | not included                                                                                         | not included                                 |
| BAlap                 | -                                                                                  | not included                                                                                         | not included                                 |
| PrpA                  | -                                                                                  | not included                                                                                         | not included                                 |
| LIP                   | -                                                                                  | not included                                                                                         | not included                                 |
| PLE                   | -                                                                                  | not included                                                                                         | not included                                 |
| TyrA                  | -                                                                                  | not included                                                                                         | not included                                 |
| dTAG                  | -                                                                                  | not included                                                                                         | not included                                 |
| dTRE                  | +                                                                                  | not included                                                                                         | +                                            |
| MNT                   | -                                                                                  | not included                                                                                         | +                                            |
| 5KG                   | -                                                                                  | not included                                                                                         | not included                                 |
| ILATk                 | -                                                                                  | not included                                                                                         | not included                                 |
| AGLU                  | -                                                                                  | not included                                                                                         | not included                                 |
| SUCT                  | -                                                                                  | not included                                                                                         | not included                                 |
| NAGA                  | -                                                                                  | not included                                                                                         | not included                                 |
| AGAL                  | +                                                                                  | not included                                                                                         | not included                                 |
| PHOS                  | -                                                                                  | not included                                                                                         | not included                                 |

|       |              |              |              |
|-------|--------------|--------------|--------------|
| GlyA  | -            | not included | not included |
| IHISa | -            | not included | not included |
| CMT   | +            | not included | not included |
| BGUR  | +            | not included | not included |
| O129R | -            | not included | not included |
| GGAA  | -            | not included | not included |
| IMLTa | -            | not included | not included |
| ELLM  | -            | not included | not included |
| ILATa | -            | not included | not included |
| ADH   | not included | +            | not included |
| TDA   | not included | -            | not included |
| IND   | not included | -            | -            |
| VP    | not included | -            | not included |
| GEL   | not included | -            | -            |
| INO   | not included | -            | -            |
| RHA   | not included | +            | -            |
| MEL   | not included | +            | not included |
| AMY   | not included | -            | not included |
| ARA   | not included | +            | +            |
| LAC   | not included | not included | -            |
| SAL   | not included | not included | -            |
| XYL   | not included | not included | +            |
| DUL   | not included | not included | -            |
| dTAR  | not included | not included | -            |
| MUC   | not included | not included | -            |

**Common reaction for VITEK, API 20 E and Lab-made tests:** BGAL/ONPG - beta-galactosidase, H2S - H2S production, dGLU/GLU - D-glucose, dMAN/MAN - D-mannitol, URE – urease, dSOR/SOR - D-sorbitol (not included Lab-made), SAC - saccharose/sucrose, CIT - citrate (sodium), ODC - ornithine decarboxylase (not included Lab-made), LDC - lysine decarboxylase,

**VITEK:** APPA - Ala-Phe-Pro-arylamidase, ADO – adonitol, PyrA - L-pyrrolydonyl-arylamidase, IARL - L-arabitol, dCEL - D-cellobiose, BNAG - beta-n-acetyl-glucosaminidase, AGLTp - Glutamyl Arylamidase pNA, GGT - gamma-glutamyl-transferase, OFF - fermentation/ glucose, BGLU - beta-glucosidase, dMAL - D-maltose, dMNE - D-mannose, BXYL - beta-xylosidase, BAlap - beta-alanine arylamidase pNA, PrpA - L-Proline arylamidase, LIP – lipase, PLE – palatinose, TyrA - Tyrosine arylamidase, dTAG - D-tagatose, dTRE - D-trehalose, MNT – malonate, 5KG - 5-keto-d-gluconate, ILATk - L-lactate alkalisation, AGLU - alpha-glucosidase, SUCT - succinate alkalisation, NAGA - beta-N-acetyl-galactosaminidase, AGAL - alpha-galactosidase, PHOS – phosphatase, GlyA - glycine arylamidase, IHISa - L-histidine assimilation, CMT – coumarate, BGUR - beta-glucuronidase, O129R - O/129 resistance (comp.vibrio.), GGAA - Glu-Gly-Arg-arylamidase, IMLTa - L-malate assimilation, ELLM – ellman, ILATa - L-lactate assimilation

**API 20E:** ADH - arginine dihydrolase, TDA - tryptophane deaminase, IND - indole production, VP - acetoin production (Voges Proskauer), GEL – gelatinase, INO – inositol, RHA – rhamnose, MEL – melibiose, AMY - amygdalin, ARA – arabinose

**Lab-made:** LAC – lactose, SAL – salicin, XYL – xylose, DUL – dulcitol, , dTAR – d-tartrate, MUC - mucate
